# Supplementary material
Source: PubMed Central journal article supplement (PMC4394320)
Supplement: pnas.201423819SI.pdf [file pnas.201423819SI.pdf]

# Supporting Information

Kawaguchi et al. 10.1073/pnas.1423819112

## SI Materials and Methods

**RNAi.** Stealth siRNAs were purchased from Life Technologies. HeLa cells ( $2 \times 10^5$ ) were grown in six-well tissue culture dishes and transfected with siRNAs (final concentration, 50 nM) using Lipofectamine RNAi MAX reagent (Life Technologies) according to the manufacturer's instructions. After 48 h, the cells were trypsinized and seeded into 12-well tissue culture dishes for the preparation of RNA and protein, or a multichamber culture slide (BD Falcon) for RNA FISH analysis. The cells were then cultured for a further 24 h before harvesting. The siRNAs used are listed in Table S3.

**RPA.** Total RNA was prepared from HeLa and SW13 cells using TRIzol reagent (Life Technologies). RPAs were performed using the RPAIII kit (Ambion). Total RNA (3  $\mu$ g) was hybridized with a  $^{32}$ P-labeled antisense RNA probe that was synthesized by using T7 RNA polymerase (TaKaRa). RNase A/T1 digestion was performed to eliminate unhybridized single-stranded RNA probes. The protected RNA fragments were then separated through 6% (wt/vol) PAGE gels containing 7 M urea. Radioactive RNA bands were visualized and quantified by using a Bio-Imaging analyzer (BAS3000; Fuji Photo Film).

**Quantitative RT-PCR.** Total RNA (1  $\mu$ g) was reverse-transcribed by using the High-Capacity cDNA Reverse Transcription Kit (Applied Biosystems). Primers were designed by using Primer3 software ([frodo.wi.mit.edu/primer3/](http://frodo.wi.mit.edu/primer3/)) and purchased from Life Technologies or Hokkaido System Science. Aliquots of cDNA were amplified by quantitative PCR using LightCycler 480 SYBR Green I Master reagent (Roche Diagnostics) according to the manufacturer's protocol.

**Immunoblotting.** Cells were lysed in IP lysis buffer [50 mM Tris-HCl (pH 7.5), 150 mM NaCl, 1% (vol/vol) TritonX-100, Complete EDTA-free protease inhibitor (Roche Diagnostics), and PhoSTOP phosphatase inhibitor (Roche Diagnostics)] and then disrupted by three pulses of sonication for 5 s. The cell extracts were cleared by centrifugation, and the protein concentration was determined by using the Bradford method. An equal volume of 2 $\times$  SDS sample buffer was added and the samples were heated before separation by SDS/PAGE. After fractionation, the proteins were transferred to FluoroTrans W membranes (Pall) by electroblotting. The antibodies used are listed in Table S1.

**RNA FISH and Immunocytochemistry.** Briefly, the cells were seeded onto a multichamber culture slide (BD Falcon), washed with PBS solution, and then fixed with 4% (wt/vol) paraformaldehyde in PBS solution at room temperature (RT) for 5–10 min. The fixed

cells were permeabilized with 0.2–0.5% Triton X-100 in PBS solution for 5 min and then rinsed with PBS solution. The slides were incubated with prehybridization solution [ $2 \times$  SSC, 1  $\times$  Denhardt solution, 50% (vol/vol) formamide, 10 mM EDTA (pH 8.0), 100  $\mu$ g/mL yeast tRNA, and 0.01% Tween-20] at 55  $^{\circ}$ C for 2 h. The prehybridized slides were then incubated with hybridization solution [prehybridization solution containing 5% (wt/vol) dextran sulfate and 2  $\mu$ g/mL digoxigenin (DIG)- and/or FITC-labeled RNA probe] at 55  $^{\circ}$ C for 16 h. After hybridization, the slides were washed twice with prewarmed wash buffer [ $2 \times$  SSC, 50% (vol/vol) formamide, and 0.01% Tween-20] at 55  $^{\circ}$ C for 30 min, and then excess RNA probes were digested by incubating with 10  $\mu$ g/mL RNase A in NTET buffer [10 mM Tris-HCl (pH 8.0), 1 mM EDTA, 500 mM NaCl, and 0.1% Tween-20] at 37  $^{\circ}$ C for 1 h. The slides were then washed once with buffer A ( $2 \times$  SSC and 0.01% Tween-20) at 55  $^{\circ}$ C for 30 min and twice with buffer B (0.1  $\times$  SSC and 0.01% Tween-20) at 55  $^{\circ}$ C for 30 min. For detection, the slides were washed with Tris-buffered saline solution containing 0.1% Tween-20 (TBST), incubated with blocking solution [1–3% (wt/vol) BSA in TBST] at RT for 1 h, and then incubated with anti-DIG and/or anti-FITC antibodies diluted in blocking solution at 4  $^{\circ}$ C overnight. Unbound antibodies were removed by three 15-min washes in TBST. The slides were then incubated with a fluorophore-conjugated secondary antibody diluted in blocking solution for 1 h at RT. After washing, the slides were mounted with Vectashield (Vector Laboratories) containing DAPI. Fluorescent images were visualized at RT under a microscope (FluoView FV1000D IX81; Olympus) equipped with U-Plan Apochromat 40 $\times$ /0.95 objective lenses (Olympus). FluoView FV10-ASW1.7 software (Olympus) was used for image acquisition and processing. All overlaid images were transferred as high-resolution TIFF files. Figures were compiled by using Adobe Photoshop (Adobe Systems). For immunocytochemistry, cells were seeded onto a multichamber culture slide (BD Falcon) and fixed with 4% (wt/vol) paraformaldehyde in PBS solution at RT for 10 min. The fixed cells were permeabilized with 0.2–0.5% Triton X-100 in PBS solution for 5 min, rinsed, and then blocked with 1–3% (wt/vol) BSA in TBST for 1 h. The slides were then incubated at 4  $^{\circ}$ C overnight with primary antibodies [diluted in TBST containing 1–3% (wt/vol) BSA] against specific proteins or the haptens of RNA probes. Unbound antibodies were removed by three 15-min washes with TBST. The slides were then incubated with Alexa-conjugated secondary antibodies (Molecular Probes) for 1 h at RT, and then washed and mounted as described earlier. The antibodies used are listed in Table S1.

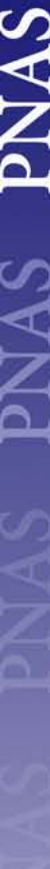Kawaguchi et al. [www.pnas.org/cgi/content/short/1423819112](http://www.pnas.org/cgi/content/short/1423819112)



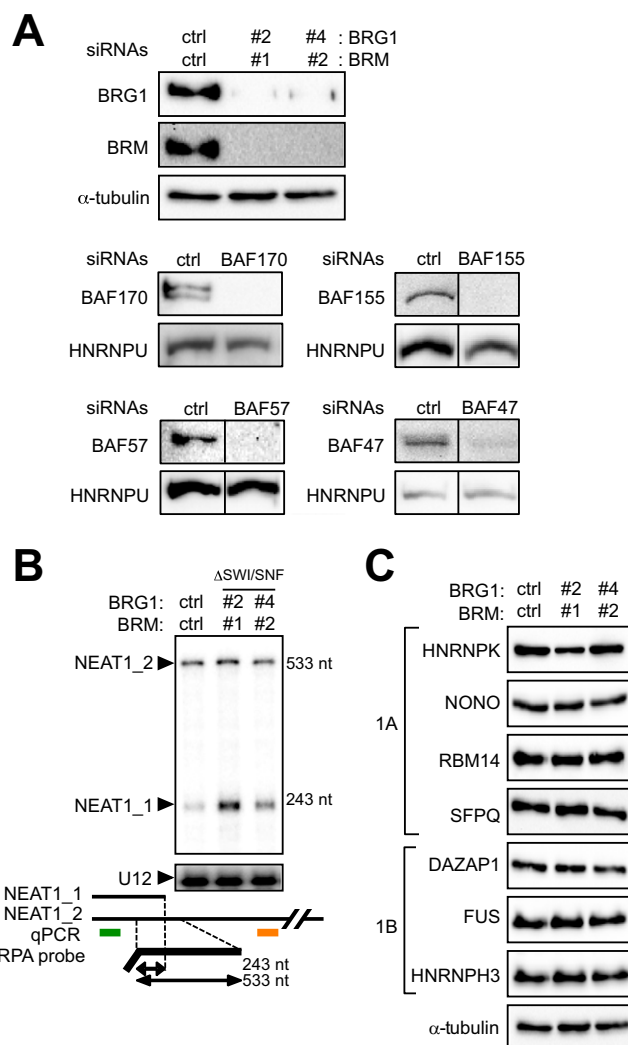

**Fig. S4.** Depletion of SWI/SNF complexes does not affect the expression of the essential paraspeckle components. (A) Immunoblot analyses of control and specific siRNA-treated HeLa cells confirming the RNAi-mediated depletion of SWI/SNF subunits (BRG1 and BRM, BAF170, BAF155, BAF57, and BAF47; as shown in Fig. 3A). The expression levels of  $\alpha$ -tubulin and HNRNPU were used as loading controls. (B) The expression levels of the two *NEAT1* isoforms in control (ctrl) and  $\Delta$ SWI/SNF cells, as detected by RPAs. The siRNAs used are shown at the top. A schematic illustration of the RPA probes and the protected fragments are shown at the bottom. The expression level of U12 snRNA was measured as a loading control. (C) Immunoblot analyses of the levels of the essential PSPs in control and  $\Delta$ SWI/SNF cells. PSPs that belong to categories 1A and 1B are shown. The expression level of  $\alpha$ -tubulin was measured as a loading control.



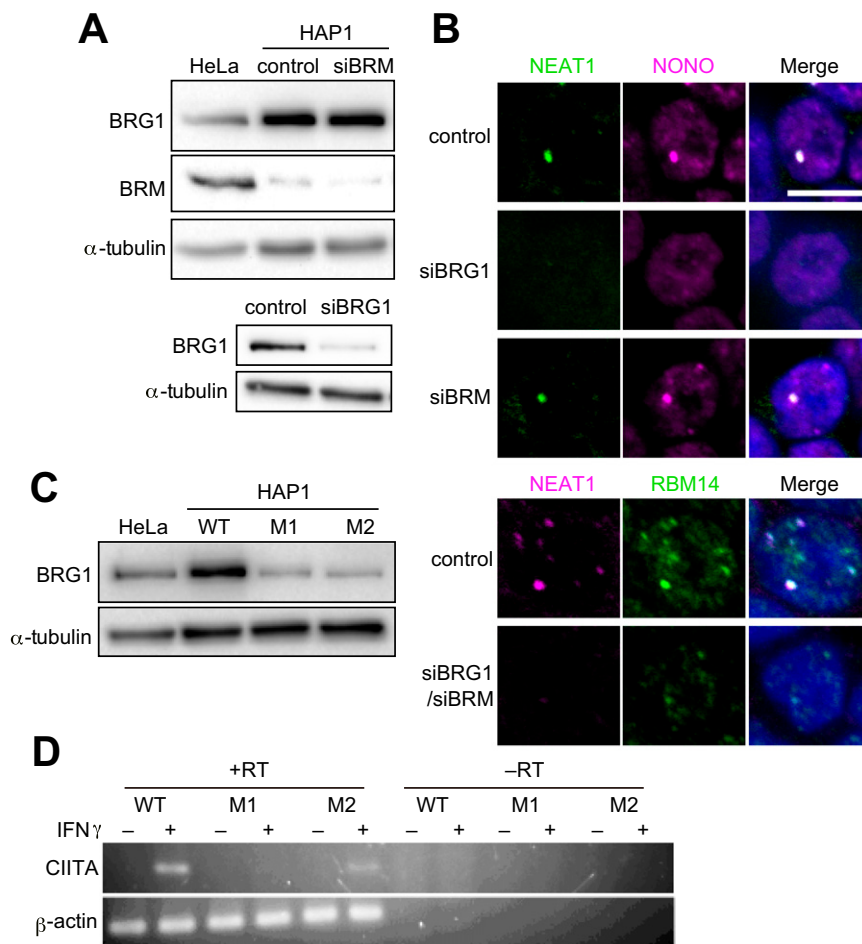

**Fig. 56.** SWI/SNF complexes are required for paraspeckle formation in HAP1 human haploid cells. (A) BRG1 is the predominant catalytic subunit of SWI/SNF complexes in HAP1 cells. BRG1 and BRM were detected in HeLa and HAP1 cells by Western blotting. Specific depletion of BRG1 and BRM by RNAi was also monitored (siBRG1 and siBRM). The expression level of  $\alpha$ -tubulin was used as a control. (B) BRG1, but not BRM, is responsible for paraspeckle formation in HAP1 cells. Paraspeckles were monitored in HAP1 cells treated with a control siRNA, siBRG1, or siBRM (*Upper*). Paraspeckles were also monitored in HAP1 cells treated with both siBRG1 and siBRM (siBRG1/siBRM; *Lower*). (C) Immunoblot analyses of WT and two mutant BRG1 proteins (M1 and M2) in HAP1 cells, as well as WT BRG1 in HeLa cells. The expression level of  $\alpha$ -tubulin was used as a control. (D) The SWI/SNF-dependent transcriptional activation was abolished in HAP1 cells expressing the ATPase mutant BRG1. The IFN- $\gamma$ -dependent induction of *CIITA* gene expression was monitored by RT-PCR in HeLa cells and WT, M1, and M2 HAP1 cells. The expression level of  $\beta$ -actin was used as a control. RT, reverse transcription.



| Target | siRNA    | Sense (5' to 3')          | Antisense (5' to 3')       |
|--------|----------|---------------------------|----------------------------|
| BRG1   | BRG1#2   | GCAGCACCUUUCGAGCAGUGGUUUA | UUAAACCACUGCUCGAAGGUGCUGC  |
| BRG1   | BRG1#4   | CAGAGCUGAGAUGGCAUAGGCCUUA | UAAGGCCUAUGGCCAUCUCAGCUCUG |
| BRM    | BRM#1    | CCAAGUCUGAAGAUCGUGCUGCUUU | AAAGCAGCACGAUCUUCAGACUUGG  |
| BRM    | BRM#2    | UCGAAGACGGCAAUUGGAGGAAAU  | AUUUCCUCCAAAUUGCCGUCUUCGA  |
| BAF170 | BAF170#2 | CCUGGUUGUACAGUUGCUACAAUUU | AAAUUGUAGCAACUGUACAACCAGG  |
| BAF155 | BAF155#2 | CCAAGAGUAUUUAACUAGCACUGCU | AGCAGUCUGAGUUAUAAUACUUCUGG |
| BAF57  | BAF57#3  | CCACCGCUCAUCAGUGAAAUUCUU  | AAGAAUUUCACUGAUGAGCGGUGG   |
| BAF47  | BAF47#3  | CCUCUGCCAUCAGACAGCAGAUCGA | UCGAUCUGCUGUCUGAUGGCAGAGG  |
| FUS    | FUS#3    | GGUAAAGAAUUCUCCGGAUUCUA   | UAGGAUUUCCGGAGAAUUCUUUACC  |
